# Supplementary material for: VqMYB154 promotes polygene expression and enhances resistance to pathogens in Chinese wild grapevine
Source: PubMed Central journal article supplement (PMC8245564; doi:10.1038/s41438-021-00585-0), 2021-07-01
Supplement: 41438_2021_585_MOESM1_ESM.pdf [file 41438_2021_585_MOESM1_ESM.pdf]

## Supplementary Information

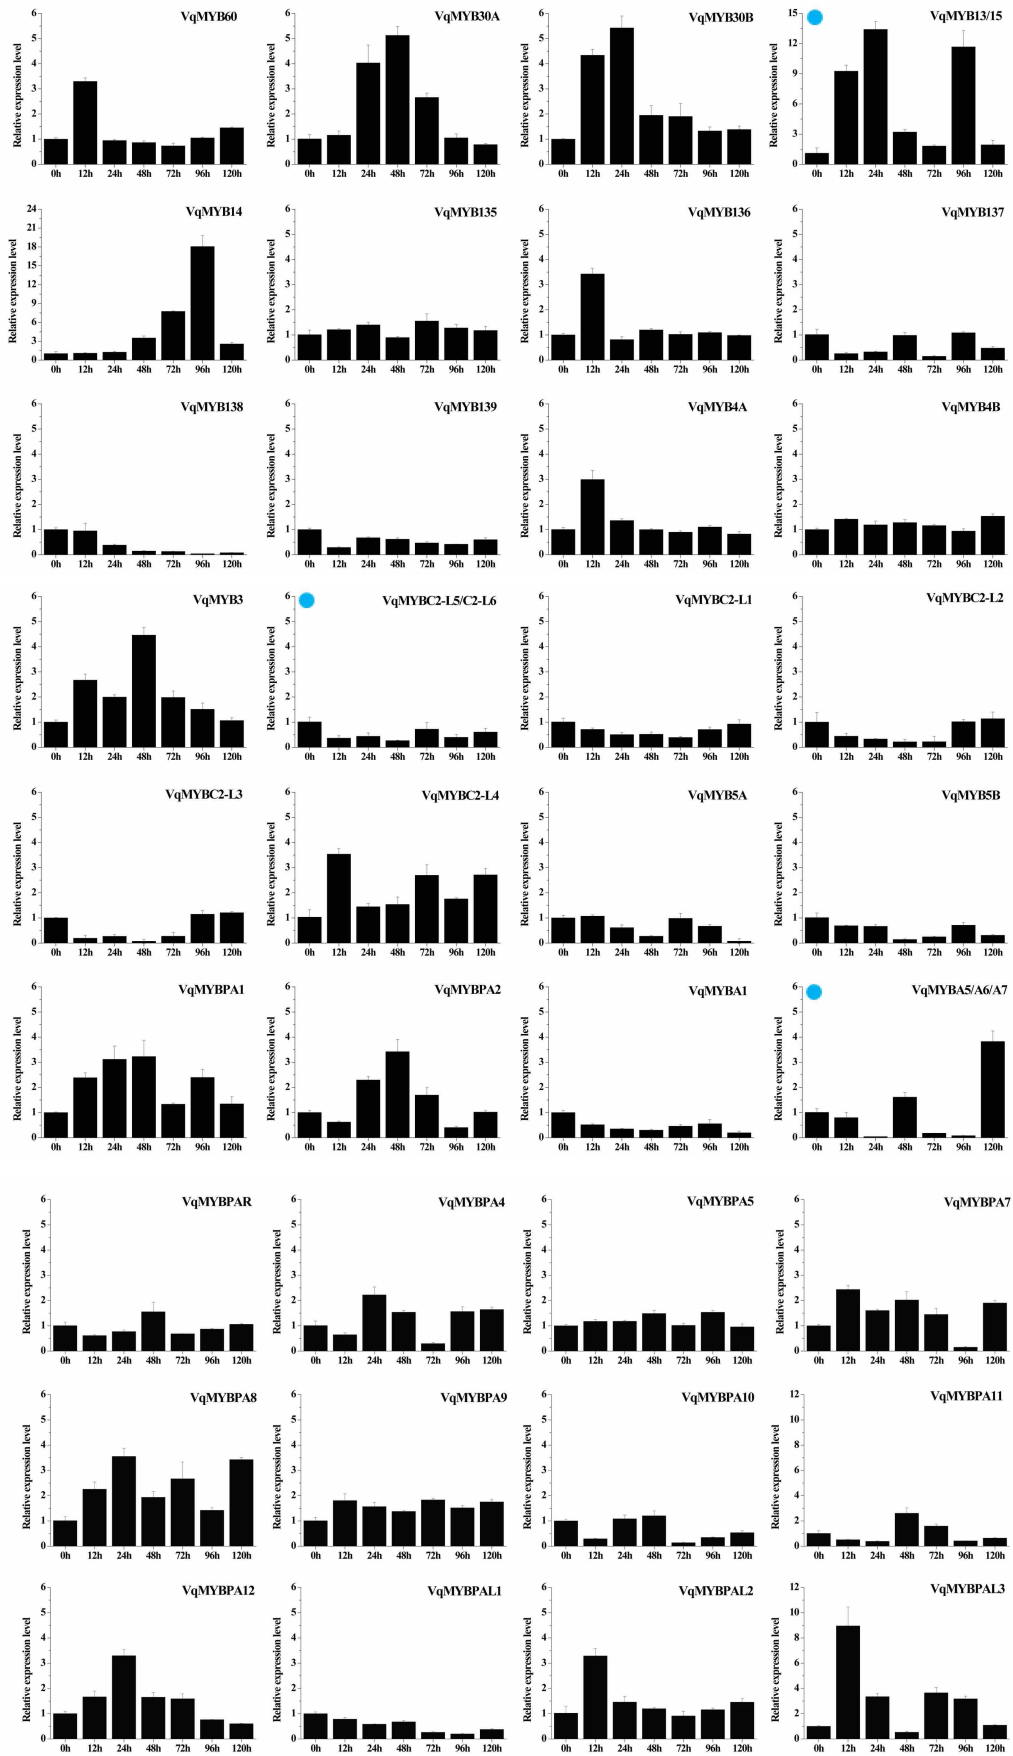

(Fig S1 to continue)

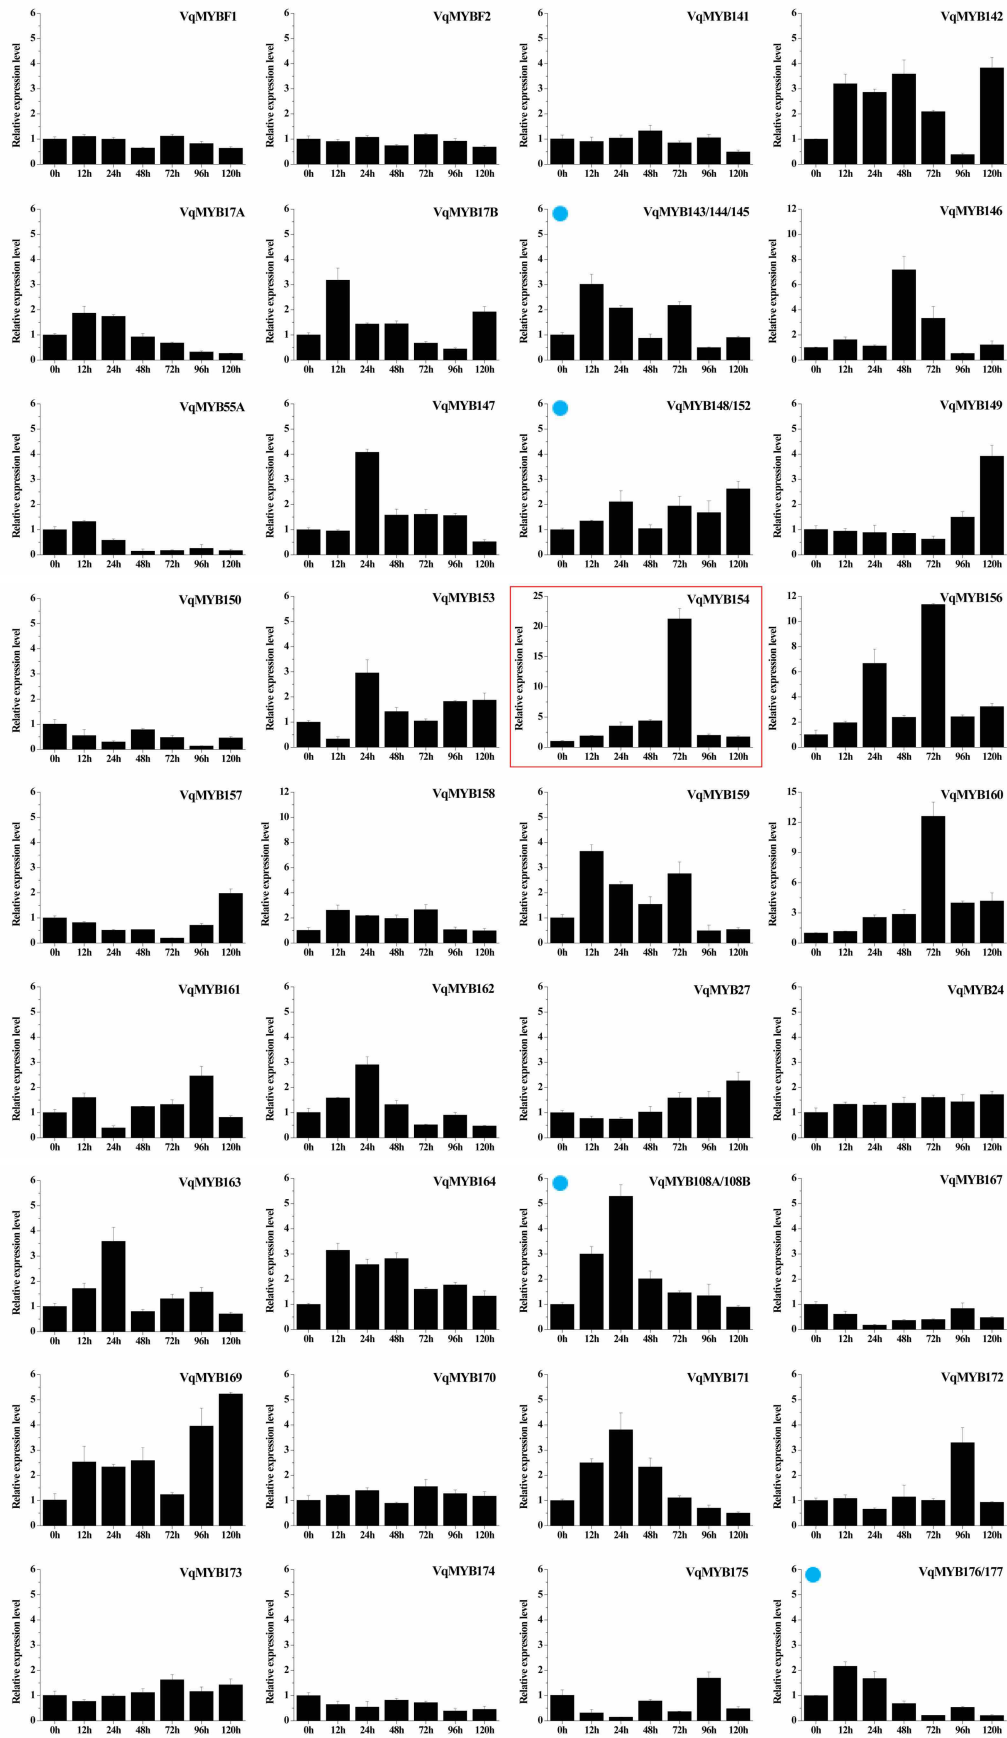

(Fig. S1 to continue)

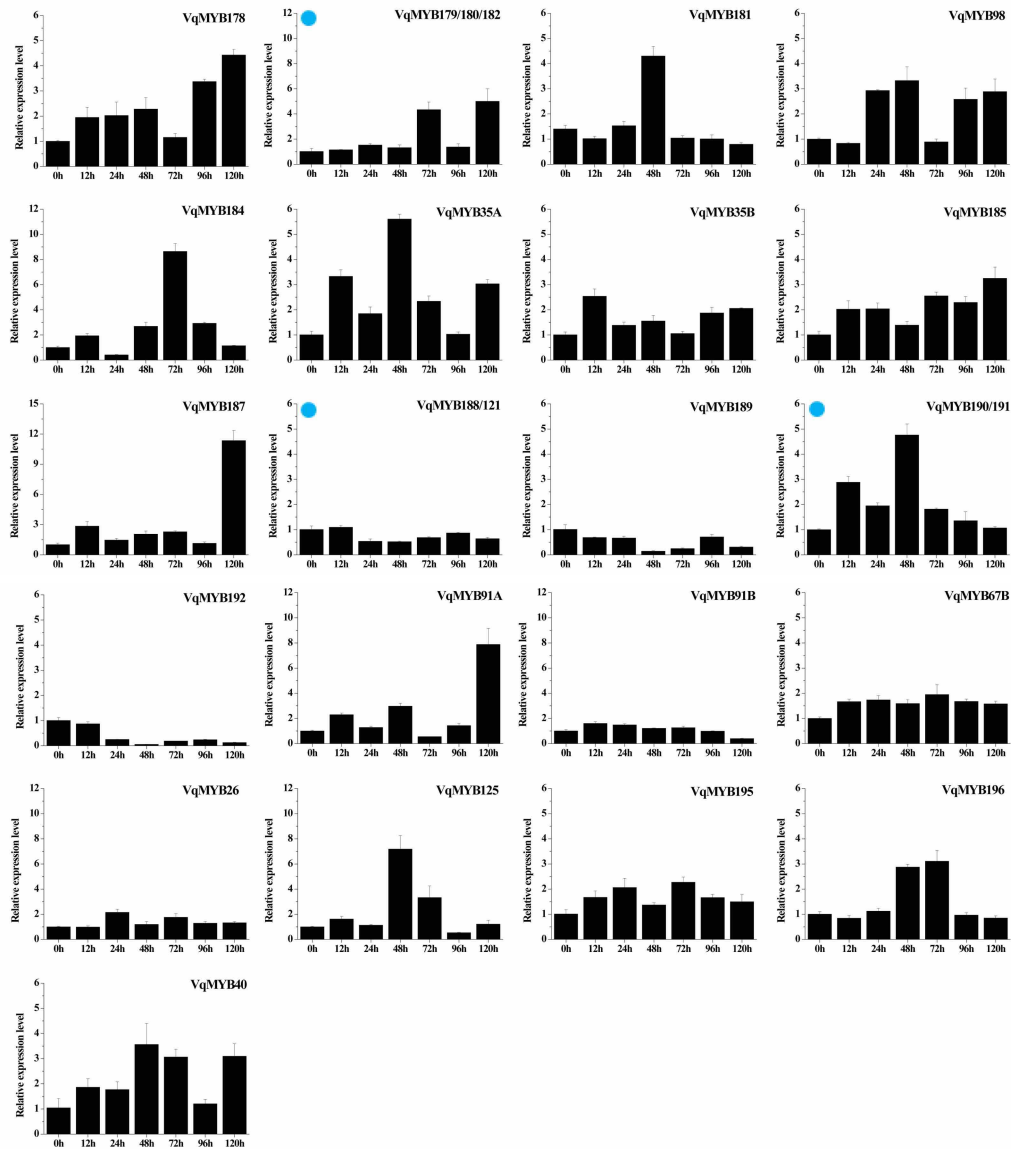

**Supplementary Fig. S1 Characteristic expression analyses of 106 R2R3-MYB genes in the leaves of Danfeng-2 under artificial inoculation with *Uncinula necator*.** The MYB genes with high homology were determined using primers based on the sequence of their conservative region and these results are marked with a blue solid circle. *VqMYB154* is marked with a red box. Grape *GAPDH* was used as a reference gene. Data are means ( $\pm$ SD) of three biological replicates.

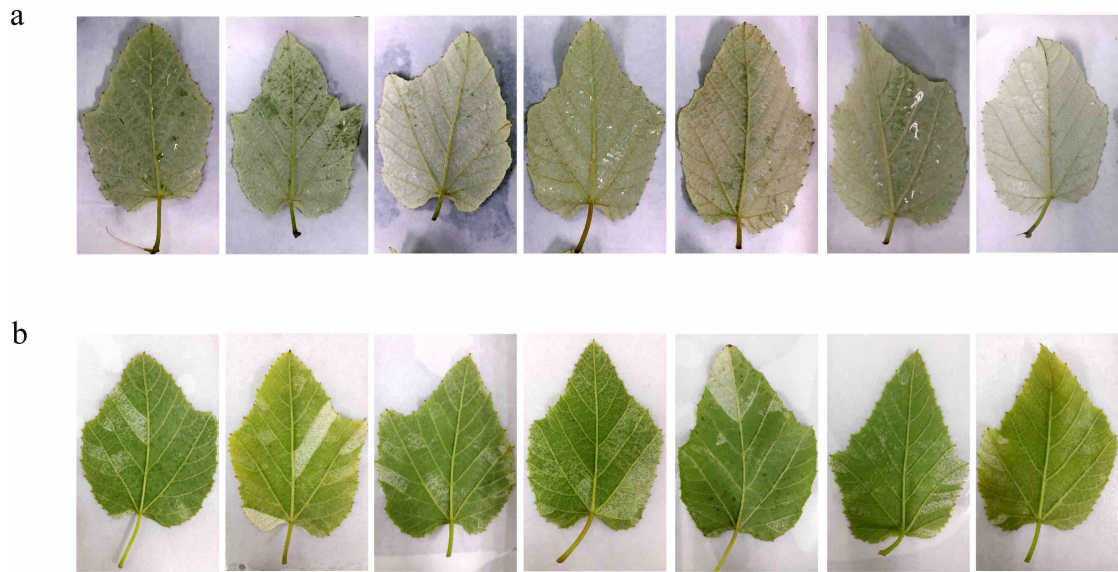

**Supplementary Fig. S2 *Agrobacterium*-mediated transient transformation in grape leaves.** **a** Grape leaves before transient transformation. **b** Grape leaves after transient transformation. The sampling position is the area where the *Agrobacterium* suspension liquid has completely penetrated.

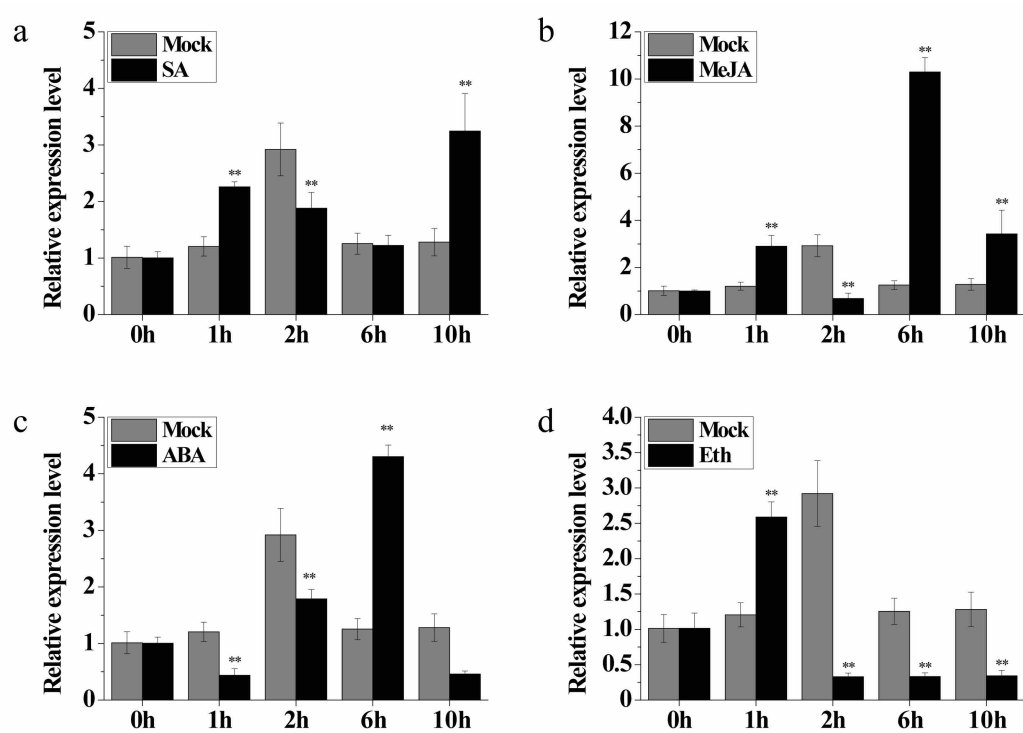

**Supplementary Fig. S3 Expression analysis of *VvMYB154* from Cabernet Sauvignon using exogenous phytohormones.** Leaves from Cabernet Sauvignon were treated with 100  $\mu$ M SA (a), MeJA (b), ABA (c) and Eth (d) and acquired at 0, 1, 2, 6, and 10 h after spraying. Results are shown as the means ( $\pm$ SD) of three biological assays. Significance was determined with GraphPad Prism using a one-way ANOVA with Fisher's LSD test (\*P<0.05; \*\*P<0.01).

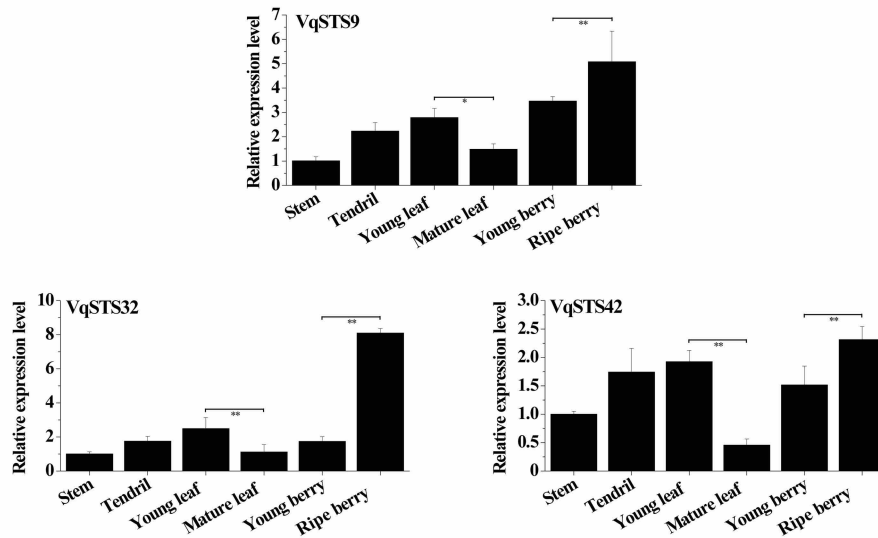

**Supplementary Fig. S4 Differential expression of *VqSTS* genes in various organs from Danfeng-2 under natural conditions.** The expression patterns of *VqSTS9*, *VqSTS32* and *VqSTS42* in various tissues were determined by qRT-PCR. Results are shown as the means ( $\pm$ SD) of three biological assays. Significance was determined with GraphPad Prism using a one-way ANOVA with Fisher's LSD test (\* $P < 0.05$ ; \*\* $P < 0.01$ ).

**Supplementary Table S1. Sequences of primers used in this study.**

| <b>Table S1</b>    | <b>List of primer used in this study</b> | <b>Use</b> |
|--------------------|------------------------------------------|------------|
| <b>Primer name</b> | <b>Primers(5'-3')</b>                    |            |
| VqMYB154-F         | ATGGGTAGAGCTCCTTGTGTGACAAG               | Gene clone |
| VqMYB154-R         | AATTGATTGACCAGACCAGCTTCATG               |            |
| RT-VqGAPDH-F       | TTCTCGTTGAGGGCTATTCCA                    | RT-PCR     |
| RT-VqGAPDH-R       | CCACAGACTTCATCGGTGACA                    |            |
| RT-VqMYB154-F      | CTGGATTGCTCTTCCTCGTAAA                   |            |
| RT-VqMYB154-R      | TGTTGTCTTCGTCTCAGTAAAG                   |            |
| RT-VqSTS32-F       | AATGCTCAGCGTGCCAAGGG                     |            |
| RT-VqSTS32-R       | CTCGGTCATGTGCTCGCTCT                     |            |
| RT-VqSTS42-F       | CGCTAAGGATCTTGCAGAGAATA                  |            |
| RT-VqSTS42-R       | AAGGGCTTGCCAACTAAA                       |            |
| RT-VqSTS9-F        | GGACGAGATGAGGAAGAAATCC                   |            |
| RT-VqSTS9-R        | ACAACAGTCTCGATGGTCAAG                    |            |
| RT-VqPAL-F         | GTTGTCGTGAAAAACCAGCTT                    |            |
| RT-VqPAL-R         | GGATCACTCACGACGAAACTC                    |            |
| RT-VqSTSs-F        | CAAGCCCTTTTGGTGATG                       |            |
| RT-VqSTSs-R        | CCACAAGTGAAAGGTGAGTCC                    |            |
| RT-VqRSGT-F        | CTACCATGGCTTAGTCCCTTTC                   |            |
| RT-VqRSGT-R        | AGCTGGCGATTTTCATCATACT                   |            |
| RT-VqCHS-F         | CATCACAAATAGCGAACACAAG                   |            |
| RT-VqCHS-R         | CCTAGCATCCAGGGAAGC                       |            |
| RT-AtActin-F       | AGTGTCTGGATCGGTGGTTC                     |            |
| RT-AtActin-R       | CCCCAGCTTTTTAAGCCTTT                     |            |
| RT-AtRBOHC-F       | AATTCTCTCATTTTCTCGGG                     |            |
| RT-AtRBOHC-R       | CCACCTTCCATTTTCAAGC                      |            |
| RT-AtPR5-F         | AACGGTAGATGTGTAACCGGAG                   |            |
| RT-AtPR5-R         | CGATCCTCCGGATGGTCTTATC                   |            |
| RT-AtICS1-F        | AATCTGGTTAGCGTTGCTGGTA                   |            |
| RT-AtICS1-R        | CAACAGCGATCTTGCCATTAGG                   |            |
| RT-AtLOX3-F        | AGACAACAGCCGTCGATTTG                     |            |
| RT-AtLOX3-R        | ACGTAACACCAGGCTCAGAA                     |            |

(Table S1 to continue)

| <b>Table S1</b>          | <b>List of primer used in this study</b>                          | <b>Use</b> |
|--------------------------|-------------------------------------------------------------------|------------|
| <b>Primer name</b>       | <b>Primers(5'-3')</b>                                             |            |
| RT-AtPDF1.2-F            | TCCATCATCACCCCTTATCTTCG                                           |            |
| RT-AtPDF1.2-R            | GCACTGATTCTTGCATGCATTA CTG                                        |            |
| ProVqMYB154-GUS-F-Sal I  | CAAGCTTGGCTGCAG <b>GTCGACT</b> AGTATAGAAGACAATAACAACAATGAGTATGAGC | pC0390     |
| ProVqMYB154-GUS-R-BamH I | GGTCTTAGAATTCCC <b>GGATCCC</b> ATGTCCACAACTGAATTGAACTTACAACAAAC   |            |
| VqMYB154-GFP-F-BamH I    | GAGCTCGGTACCCGG <b>GGATCC</b> ATGGGTAGAGCTCCTTGTGTGACAAG          | pC2300     |
| VqMYB154-GFP-R-Sal I     | CTTGCTCACCATGGT <b>GTCGACA</b> AATTGATTGACCAGACCAGCTTCATG         |            |
| ProVqSTS9-ABAI-F-Sma I   | TCCCCCGGGAGCCTACCAAAGTCAAGTTGTTTCGTGGA                            | pAbAi      |
| ProVqSTS9-ABAI-R-Xho I   | CC <b>CTCGAG</b> TTGATCCTAGCTACGAACTCAAATTGAAGCTG                 |            |
| ProVqSTS32-ABAI-F-Sma I  | CCCCCGGGCCTCTAACTGGAAATCAATCCCTTGTTCATTTG                         |            |
| ProVqSTS32-ABAI-R-Xho I  | CC <b>CTCGAG</b> GCTGTGTCCACCAACTCTCATCCA                         |            |
| ProVqSTS42-ABAI-F-Kpn I  | <b>GGTACCC</b> CCACCCGTGGAAAAGTCAAATGAAC                          |            |
| ProVqSTS42-ABAI-R-Xho I  | <b>CCTCGAG</b> GGATGCCAGCTAGGTACTCAAAT                            |            |
| 3×L5box-ABAI-F-Sac I     | <b>CGAGCTC</b> ACCAACTACCAACTACCAACT                              |            |
| 3×L5box-ABAI-R-Xho I     | CC <b>CTCGAG</b> AGTTGGTAGTTGGTAGTTGGT                            |            |
| 3×ACbox-ABAI-F-Sac I     | <b>CGAGCTC</b> GAGTTGGTGAGAGAGTTGGTGAGAGAGTTGGTGAGA               |            |
| 3×ACbox-ABAI-R-Xho I     | CC <b>CTCGAG</b> TCTCACCAACTCTCTCACCAACTCTCTCACCAACTC             |            |
| 3×MYBCORE-ABAI-F-Sac I   | <b>CGAGCTC</b> CAGTTACAGTTACAGTTA                                 |            |
| 3×MYBCORE-ABAI-R-Xho I   | CC <b>CTCGAG</b> TAACTGTAAGTAACTG                                 |            |
| ProVqSTS9-GUS-F-BamH I   | CG <b>GGATCC</b> AGCCTACCAAAGTCAAGTTGTTTCGTGGA                    | pC1391     |
| ProVqSTS9-GUS-R-Sma I    | CCCCCGGGTTGATCCTAGCTACGAACTCAAATTGAAGCTG                          |            |
| ProVqSTS32-GUS-F-BamH I  | CG <b>GGATCC</b> CCTCTAACTGGAAATCAATCCCTTGTTCATTTG                |            |
| ProVqSTS32-GUS-R-Sma I   | CCCCCGGGGCTGTGTCCACCAACTCTCATCCA                                  |            |
| ProVqSTS42-GUS-F-BamH I  | CG <b>GGATCC</b> CCACCCGTGGAAAAGTCAAATGAAC                        |            |
| ProVqSTS42-GUS-R-Sma I   | CCCCCGGGGGATGCCAGCTAGGTACTCAAAT                                   |            |
| VqMYB154-AD-F-Cla I      | CC <b>ATCGAT</b> ACATGGGTAGAGCTCCTTGTGTGACAAG                     | pGADT7     |
| VqMYB154-AD-R-Xho I      | CC <b>CTCGAG</b> CTAAATTTGATTGACCAGACCAGCTTCATG                   |            |
| VqMYB14-AD-F-EcoR I      | CG <b>GAAATC</b> ATGGGGAGAGCTCCATGTTGTG                           |            |
| VqMYB14-AD-R-BamH I      | CG <b>GGATCC</b> TCAIATTTCTGATAATTCATGCAACTCCC                    |            |
| VqMYB15-AD-F-EcoR I      | CG <b>GAAATC</b> ATGGTAAGAGCTCCTTGTGTGATAAG                       |            |
| VqMYB15-AD-R-BamH I      | CG <b>GGATCC</b> TCAAAGCTCCTGTAAAGCCGCC                           |            |



(Table S1 to continue)

| <b>Table S1</b>     | <b>List of primer used in this study</b>        |            |
|---------------------|-------------------------------------------------|------------|
| <b>Primer name</b>  | <b>Primers(5'-3')</b>                           | <b>Use</b> |
| VqMYB154-BD-F-Sal I | ACGC <b>GTCGAC</b> CTATGGGTAGAGCTCCTTGTGTGACAAG | pGBKT7     |
| VqMYB154-BD-R-Pst I | AA <b>CTGCAG</b> CTAAATTTGATTGACCAGACCAGCTTCATG |            |

**Supplementary Table S2. Primers used in qRT-PCR for characteristic expression detection of resistance to *Uncinula necator* among 106 *VqMYBs* from *Vitis quinquangularis* accession Danfeng-2.**

| <b>Table S2</b>    | <b>Primer sequence</b>  |
|--------------------|-------------------------|
| <b>Primer name</b> | <b>Primers(5'-3')</b>   |
| RT-VqMYB60-F       | CAAGGCTACTAGAAGGTTGGATG |
| RT-VqMYB60-R       | CCATGGAGTTTCCGGTCATATC  |
| RT-VqMYB30A-F      | GAAGTTTCCCACAGGTGTAGAT  |
| RT-VqMYB30A-R      | TAGCCATGTGGATGTCTGTTT   |
| RT-VqMYB30B-F      | GATTGACTCCTTGGACTCTTC   |
| RT-VqMYB30B-R      | AGCACCGCCTTCTTCAAATA    |
| RT-VqMYB13/15-F    | GGTCGGACTGACAATGAGATAAA |
| RT-VqMYB13/15-R    | GCAGTAGAGTGGCCTTTAGAAT  |
| RT-VqMYB14-F       | TCTGAGGCCGATATCAAAC     |
| RT-VqMYB14-R       | GGGACGCATCAAGAGAGTGT    |
| RT-VqMYB135-F      | AGGCTTCGATGGACGAACTA    |
| RT-VqMYB135-R      | CCAAGAAGTTGATGGAGCTTGA  |
| RT-VqMYB136-F      | ACTGTTGAAGCTAAGCCGATAG  |
| RT-VqMYB136-R      | GACTGGTGATTGATGAAGAGGAG |
| RT-VqMYB137-F      | CCAGGAAGAACAGACAATGAGA  |
| RT-VqMYB137-R      | GGAGAGACCATTGGAGATGAAG  |
| RT-VqMYB138-F      | CGCCAGCTGTGAATGAAATG    |
| RT-VqMYB138-R      | GGGTGTAGGAATCGTCTGTAAAG |
| RT-VqMYB139-F      | CCTAGGCTCATTCCAGTACAAC  |
| RT-VqMYB139-R      | TGGGCTGCATCTCCATTATC    |
| RT-VqMYB4A-F       | ACCGGACGTTACAACCATATC   |
| RT-VqMYB4A-R       | GGTTGAGGTCTGGACACTTT    |
| RT-VqMYB4B-F       | GCCGAAACCCAGATGAAGAA    |
| RT-VqMYB4B-R       | CCAGGCTGCAGTAGAAACAA    |
| RT-VqMYB3-F        | GTCACCACTGAAGAACTCTACC  |
| RT-VqMYB3-R        | CGGTTGTTTCTTTGGTTCCTTTA |
| RT-VqMYBC2L5/L6-F  | CTCATCAGTGGCGGAATCAA    |
| RT-VqMYBC2L5/L6-R  | TGTGGTGGTGTGGTCAAAG     |
| RT-VqMYBC2L1-F     | TGATGCCGGAAGCTGTTTAG    |

(Table S2 to continue)

| <b>Table S2</b>    | <b>Primer sequence</b>     |
|--------------------|----------------------------|
| <b>Primer name</b> | <b>Primers(5'-3')</b>      |
| RT-VqMYBC2L1-R     | CGCCTCTTCGGTAGTATCTAGT     |
| RT-VqMYBC2L2-F     | GCTTCGGGTACTAGCAAATCA      |
| RT-VqMYBC2L2-R     | CGCTGAGCCACATGTAGAAT       |
| RT-VqMYBC2L3-F     | ACTGGCGCATGCGATAATA        |
| RT-VqMYBC2L3-R     | GTCAAGGGAGGCGGATATTT       |
| RT-VqMYBC2L4-F     | TCCCTGATAGCGGGTAGATT       |
| RT-VqMYBC2L4-R     | GATACCCATCCTTATGAGCTTTCT   |
| RT-VqMYB5A-F       | CTAGAAGTGTCTGGGAACCT       |
| RT-VqMYB5A-R       | TGCAAGGATCCATTTCACATAC     |
| RT-VqMYB5B-F       | TGACAGCCGGTGTCTTTAAT       |
| RT-VqMYB5B-R       | AGCATACTAACACAACAACAACC    |
| RT-VqMYBPA1-F      | AGATCAACTGGTTATGCTTGCT     |
| RT-VqMYBPA1-R      | AACACAAATGTACATCGCACAC     |
| RT-VqMYBPA2-F      | CCTCTGATGCTCTCAACTCATT     |
| RT-VqMYBPA2-R      | GAAGACCACTCACTCCTTCTTG     |
| RT-VqMYBA1-F       | GAGGGTGATTTTCCATTTGAT      |
| RT-VqMYBA1-R       | CAAGAACAACCTTTGAACTTAAACAT |
| RT-VqMYBA5/A6/A7-F | ACTTGTCTCGGACCTTCTA        |
| RT-VqMYBA5/A6/A7-R | GACAGAGGTGGCGTTGAATA       |
| RT-VqMYBPA4-F      | ACTCTTTGTCCTCCGGATTTC      |
| RT-VqMYBPA4-R      | CGCCCACCACGTTATTATCT       |
| RT-VqMYBPAR-F      | GCCGACAGGAACAAGAACA        |
| RT-VqMYBPAR-R      | CTGCCAGTGGAGCTATGAATAC     |
| RT-VqMYBPA5-F      | GCCGAATTCACCTCGATTA        |
| RT-VqMYBPA5-R      | TGGCTCAGTGGCAATGAATA       |
| RT-VqMYBPA7-F      | GAAGATAAGATACTCACGGCTTACA  |
| RT-VqMYBPA7-R      | CAGCCATCTCAGTCTACAACCTC    |
| RT-VqMYBPA11-F     | CCAAAGCAAAGACGACAGAAAG     |
| RT-VqMYBPA11-R     | CATTGCTGGGTTTGGTGAATAA     |
| RT-VqMYBPA8-F      | CAGGGCGAACAGACAATGA        |

(Table S2 to continue)

| <b>Table S2</b>       | <b>Primer sequence</b>  |
|-----------------------|-------------------------|
| <b>Primer name</b>    | <b>Primers(5'-3')</b>   |
| RT-VqMYBPA8-R         | AGCAAATCTGATGGAGGAGAAG  |
| RT-VqMYBPA9-F         | GGACAGCTCTTGAGGACAAA    |
| RT-VqMYBPA9-R         | ACCATCTAAGCCTGCAACTC    |
| RT-VqMYBPA10-F        | CCTCTACTGTTTCCTGTTGATGA |
| RT-VqMYBPA10-R        | CTGGTGGTTGTTCTGCTACTAT  |
| RT-VqMYBPA12-F        | TTCGGACCAAGGCATTTAGG    |
| RT-VqMYBPA12-R        | GGTTCATCATGGAGGGTTCCTT  |
| RT-VqMYBPAL1-F        | GAGGATGGCTTATGTGAGAGTG  |
| RT-VqMYBPAL1-R        | AACTGCTGTCCACCATCTTC    |
| RT-VqMYBPAL2-F        | CAAAGGTGATGGAGATGGAGAG  |
| RT-VqMYBPAL2-R        | CAAAGGGCCCTCACTAGAATAA  |
| RT-VqMYBPAL3-F        | TGCCAGGTCTGAACAGATAATG  |
| RT-VqMYBPAL3-R        | AGTTTGGAGCAGCCTCTTG     |
| RT-VqMYBF1-F          | CGATGATGATGGGAATGGAGTAA |
| RT-VqMYBF1-R          | CCAGAAGATGACTCGCCATAAG  |
| RT-VqMYBF2-F          | GGGAGTGGTTTACTCCTTCATC  |
| RT-VqMYBF2-R          | CCTCCATCCCAAAGCTCATAG   |
| RT-VqMYB141-F         | GTTCTCCTACTTCGACGCTTAG  |
| RT-VqMYB141-R         | CATGCCTTCCACTCTGTGTTG   |
| RT-VqMYB142-F         | GGCACGTTAGGGACTGAAAT    |
| RT-VqMYB142-R         | CCGTCACCAGACCTACTAAGA   |
| RT-VqMYB17A-F         | CAACGAGCTGGAGGATTCAT    |
| RT-VqMYB17A-R         | CATAGCAGGGAATGTGGGATAG  |
| RT-VqMYB17B-F         | GGACCAGCACATCTACATCAA   |
| RT-VqMYB17B-R         | CTGAACCGGTCATCATGTCTT   |
| RT-VqMYB143/144/145-F | GGAAGGACCGACAACGAAAT    |
| RT-VqMYB143/144/145-R | CAGAAGATCGAGTCGAGGACTA  |
| RT-VqMYB146-F         | GCTAGAGCTAGAGCCACTACTA  |
| RT-VqMYB146-R         | GATCCGGGATGCAGATCAAA    |
| RT-VqMYB55A-F         | ATCCAGTGAATTGAACCTCCTC  |

(Table S2 to continue)

| <b>Table S2</b>    | <b>Primer sequence</b>   |
|--------------------|--------------------------|
| <b>Primer name</b> | <b>Primers(5'-3')</b>    |
| RT-VqMYB55A-R      | CCATTCCATAGCCTCGTGTT     |
| RT-VqMYB147-F      | GACTTCCTGCAGTACCATCATC   |
| RT-VqMYB147-R      | GCACTCTTGACCCTTCTGTTAG   |
| RT-VqMYB148/152-F  | CGTTGGCAGAAACCCTTATTG    |
| RT-VqMYB148/152-R  | ATGGATGCTTGGTCCTTGAT     |
| RT-VqMYB149-F      | GTACTTCCCAGGCCATGAA      |
| RT-VqMYB149-R      | CTCTTGGGTTTGAAGGAGAGAG   |
| RT-VqMYB150-F      | GAGCCGGAGTATGATCAGTATG   |
| RT-VqMYB150-R      | CGCCACCTCCACTACTATTT     |
| RT-VqMYB153-F      | GGCTTCTGGTTTCAGGAGAA     |
| RT-VqMYB153-R      | CCTTGTGGCTTAATGTTGAGATG  |
| RT-VqMYB154-F      | AGAGTTGCAGGTTGAGATGG     |
| RT-VqMYB154-R      | TGTTGTTGTAGAGAGTGACGATAA |
| RT-VqMYB156-F      | TTCTTGTGGAAGCAGCAGAG     |
| RT-VqMYB156-R      | ACCAGTTGATCATGCCAGTC     |
| RT-VqMYB157-F      | ACCCAGATTCTAAACCACCTTC   |
| RT-VqMYB157-R      | CTCTGTGCCCATTTCCATATCT   |
| RT-VqMYB158-F      | CGGCCAGCTCTTTGTTAATTC    |
| RT-VqMYB158-R      | GACTCCTCGTTCAGTAGGAAAC   |
| RT-VqMYB159-F      | CCCAAACCAGATGGACTTATCC   |
| RT-VqMYB159-R      | CATCTCTCCAGGTAGCTTGTTT   |
| RT-VqMYB160-F      | CCAACAACAATGCCGGTTATAC   |
| RT-VqMYB160-R      | AACTGGAGACTGGGAGAGAA     |
| RT-VqMYB161-F      | AGTCCTTTGGGTTGCCCTTATC   |
| RT-VqMYB161-R      | GCCCAGAAATGGGCTTAGAA     |
| RT-VqMYB162-F      | AAICTCCCTGTCCTCAICT      |
| RT-VqMYB162-R      | TGGGCTGAAAGAGTAGTGATTG   |
| RT-VqMYB24-F       | ATTCTCCACCATCTACCCT      |
| RT-VqMYB24-R       | GTAGCTGCATAGACCAGATGTC   |
| RT-VqMYB163-F      | CTGCTGCTGATACTGTGACTAC   |

(Table S2 to continue)

| <b>Table S2</b>       | <b>Primer sequence</b>   |
|-----------------------|--------------------------|
| <b>Primer name</b>    | <b>Primers(5'-3')</b>    |
| RT-VqMYB163-R         | GATGAGACAGTGATCTGGTTGG   |
| RT-VqMYB164-F         | TGATTCGGTGTGTGTGGATG     |
| RT-VqMYB164-R         | TCGGCATGGTTGAGAGATTG     |
| RT-VqMYB108A/B-F      | ATGAACATGGACCTGAGGAAAG   |
| RT-VqMYB108A/B-R      | TTCGCCGTGGATGGTAATG      |
| RT-VqMYB167-F         | CTTCATCTGGCACTGATCTCTC   |
| RT-VqMYB167-R         | CTGCTGCATAGCAGGAGTATAA   |
| RT-VqMYB169-F         | GCAAGGAGAGATGATGAAGAGG   |
| RT-VqMYB169-R         | TCAAGAAGAGCTTCCAACGTATAG |
| RT-VqMYB170-F         | CTTCGGCATATGGCGGATATAG   |
| RT-VqMYB170-R         | CACCGAGTTTAGAGTACCCAAC   |
| RT-VqMYB171-F         | GGCTTTCCCGTAGTTTCTTCT    |
| RT-VqMYB171-R         | CGTTGGAGGATCGTCTTCTT     |
| RT-VqMYB172-F         | ACTTCTCTCTCCCTCTCTCTC    |
| RT-VqMYB172-R         | CAAAGGAGCCATCGTAGGTATC   |
| RT-VqMYB173-F         | CAACAGCTGCGATAGGGTTA     |
| RT-VqMYB173-R         | TCGAGCATCCTCCACTCTAT     |
| RT-VqMYB174-F         | CTGTGAGTTGGGTTTAGGTATGT  |
| RT-VqMYB174-R         | CCGACATGTAGTTCCTCACTTC   |
| RT-VqMYB175-F         | GGATGCGATGAGAGGTGTTATAG  |
| RT-VqMYB175-R         | CACAGAAAGTGTGAGGAAGGT    |
| RT-VqMYB176/177-F     | GCAGAACAGACAATGCAATCAA   |
| RT-VqMYB176/177-R     | GGGCTACCATCTTCCAACATAC   |
| RT-VqMYB178-F         | CTCGAGCAGTTCCTACGATATTC  |
| RT-VqMYB178-R         | AGATGCAAGGCAGGTTTCAT     |
| RT-VqMYB179/180/182-F | CTGGTTAACCTGAAGGAGCTTAT  |
| RT-VqMYB179/180/182-R | GCTGGAGATTGAAGGAGATACTG  |
| RT-VqMYB181-F         | ACCTCTTTGGAACACCATCTT    |
| RT-VqMYB181-R         | CTGTTGGGTGGAGACCAATTA    |
| RT-VqMYB98-F          | GCTCCTACTGGTGATGAGAAAG   |

(Table S2 to continue)

| <b>Table S2</b>    | <b>Primer sequence</b>  |
|--------------------|-------------------------|
| <b>Primer name</b> | <b>Primers(5'-3')</b>   |
| RT-VqMYB98-R       | CCACCAAATCCATCTCCTTCTT  |
| RT-VqMYB184-F      | TTGAGGGCTCTTCCATGAATC   |
| RT-VqMYB184-R      | GCGCCATAAGTACTGGTATCTC  |
| RT-VqMYB35A-F      | CAACACCGCAACACGAATG     |
| RT-VqMYB35A-R      | TGAGAACCTGGAATTGCTCTAC  |
| RT-VqMYB35B-F      | CCAAAGAATGGAACCCGAATTG  |
| RT-VqMYB35B-R      | GGCTTTAAGCTGAGTGAGAAGA  |
| RT-VqMYB185-F      | GGATCATGTTGGGCTCCTT     |
| RT-VqMYB185-R      | CGCCCATGCTTATACTCTCTAC  |
| RT-VqMYB27-F       | TCTTCGCCCTGACCTTAAAC    |
| RT-VqMYB27-R       | ATCCACGACCACTTGTTACC    |
| RT-VqMYB187-F      | TCTCCGGTGTGGGACTATT     |
| RT-VqMYB187-R      | ACGCCATTCCGTGTTTCAT     |
| RT-VqMYB188/121-F  | GAACTACTGGAGGACCCATTTC  |
| RT-VqMYB188/121-R  | TGCTGCTGCTGCTGATAAA     |
| RT-VqMYB40-F       | CTTGGAGTTGGGACTACTGATG  |
| RT-VqMYB40-R       | CCATGGAAGGGTTGAGAGAAT   |
| RT-VqMYB189-F      | CTTCTTCATCTGCTTCGTCCA   |
| RT-VqMYB189-R      | TCATCCCAGAAGCCCAAATC    |
| RT-VqMYB190/191-F  | GGTTGCCTGGAAGAACAGATA   |
| RT-VqMYB190/191-R  | GACTGGGTCAATTCCCATCTT   |
| RT-VqMYB192-F      | AAGCACAGAGTTCAGTTCCC    |
| RT-VqMYB192-R      | CCATTCCAAGTGCTCTCAGTAG  |
| RT-VqMYB91A-F      | GCAGAGAGAGCAGAAAGAGAAC  |
| RT-VqMYB91A-R      | GCAGGACGCTCTTCTACTAA    |
| RT-VqMYB91B-F      | TGATGCCGGTCCAACAAA      |
| RT-VqMYB91B-R      | CTCCATGTCGCTTCTTCTT     |
| RT-VqMYB67B-F      | CATTGGAAGCACCCATTATTT   |
| RT-VqMYB67B-R      | CAAGAGGTTCAACATGAGCATTC |
| RT-VqMYB26-F       | CTGCCAGATCCTTCTTCGTATG  |

(Table S2 to continue)

| <b>Table S2</b>    | <b>Primer sequence</b>  |
|--------------------|-------------------------|
| <b>Primer name</b> | <b>Primers(5'-3')</b>   |
| RT-VqMYB26-R       | CTTCATTGCCAGCACATAATC   |
| RT-VqMYB125-F      | TGCCAGGGAGAACTGATAATG   |
| RT-VqMYB125-R      | TGGGAAGAAGATGGTGAAGAAG  |
| RT-VqMYB195-F      | GGCTTCTACTGCTGCTTATCT   |
| RT-VqMYB195-R      | CCTGCTGTACTACTGGGTATG   |
| RT-VqMYB196-F      | AGGAACACCTCATGGATGATAAG |
| RT-VqMYB196-R      | GGATCAACGTTGGGAATCAAAG  |
